# Supplementary material for: A Novel C Type CpG Oligodeoxynucleotide Exhibits Immunostimulatory Activity In Vitro and Enhances Antitumor Effect In Vivo
Source: Front Pharmacol. 2020 Feb 6;11:8. doi: 10.3389/fphar.2020.00008 (PMC7015978; doi:10.3389/fphar.2020.00008)
Supplement: Supplementary file 2 [file Table_1.xlsx]

## Sheet: 工作表1
	Table 1. CpG ODN sequence list
	ODN	Sequence (5′ to 3′)
	ODN 1	TCGCGAACGTTCGCCGACGTTCGAACGTCGG
	ODN 2	TCGCGATCGATCGCCGCGTTCGAACGCGG
	ODN 3	TCGCGAACGTTCGCCCCGTTCGAACGGGG
	ODN 4	TCGCGAACGTTCGCCGGTTCGAACCGG
	ODN 5	TCCCGAACGTTCGGCGCGTTCGAACGCGG
	ODN 6	TCGCGTACGTACGCCGCGTTCGAACGCGG
	ODN 7	TCGCGAAACGTTTCGCCGCGTTCGAACGCGG
	ODN 8	TCGCAACGTTGCCGCGTTCGAACGCGG
	ODN 9	TCGCGAACGTTCGCCGCCTTCGAAGGCGG
	ODN 10	TCGCGAACGTTCGCCGCGATCGATCGCGG
	ODN 11	TCGCGAACGTTCGCCGCTTCGAAGCGG
	ODN 12	TCGGGAACGTTCCCCGCGTTCGAACGCGG
	ODN 14	TCGCCGAACGTTCGGCCGCGGTTCGAACCGCGG
	ODN 15	TCGCCGAACGTTCGGCCGCGTTCGAACGCGG
	ODN 16	TCGCGAACGTTCGCTCGCGTTCGAACGCGG
	ODN 17	TCGCGAACGTTCGCGCGCGTTCGAACGCGG
	ODN 18	TCGCGATCGATCGCCGCGTACGTACGCGG
	ODN 19	TCGCGCAACGTTGCGCCGCGTTCGAACGCGG
	ODN 20	TCGCCAACGTTGGCCGCGTTCGAACGCGG
	HP06T07	TCGCGAACGTTCGCCGCGTACGTACGCGG
	GC	TGGCCAAGCTTGGGCCCCTTGCAAGGGCC
	2216	GGgggacgatcgtcGGGGGG
	2006	TCGTCGTTTTGTCGTTTTGTCGTT
	2395	TCGTCGTTTTCGGCGCGCGCCG
	Bases in capital letters are phosphorothioate and those in lower case are phosphodiester.
